# Supplementary material
Source: PubMed Central journal article supplement (PMC6027955)
Supplement: NIHMS76816-supplement-sTable.pdf [file NIHMS76816-supplement-sTable.pdf]

## Brain TSPO Imaging and Gray Matter Volume in Schizophrenia Patients and in People at Ultra High Risk of Psychosis: An [<sup>11</sup>C]PBR28 Study

<sup>1,2</sup>Sudhakar Selvaraj<sup>#</sup>, <sup>2</sup>Peter S Bloomfield<sup>#</sup>, <sup>1</sup>Cao Bo, <sup>3</sup>Mattia Veronese, <sup>3</sup>Federico Turkheimer, <sup>2,4</sup> Oliver D Howes.

### Supplementary Table: 1

| Mean Regional DVR of [ <sup>11</sup> C]PBR28 | Control | Stdev | Schizophrenia | Stdev | F      | <i>p</i> | Control | Stdev | Ultra high risk | Stdev | F      | <i>P</i> |
|----------------------------------------------|---------|-------|---------------|-------|--------|----------|---------|-------|-----------------|-------|--------|----------|
| Total grey Matter                            | 2.465   | 0.020 | 2.557         | 0.014 | 20.802 | <0.001   | 2.032   | 0.017 | 2.088           | 0.021 | 10.332 | 0.004    |
| Frontal lobe                                 | 2.489   | 0.037 | 2.606         | 0.025 | 9.883  | 0.005    | 2.000   | 0.038 | 2.087           | 0.026 | 5.339  | 0.030    |
| Temporal lobe                                | 2.282   | 0.065 | 2.518         | 0.044 | 13.089 | 0.001    | 1.914   | 0.041 | 2.001           | 0.028 | 4.417  | 0.047    |

**Table 1** Microglial activity, as measured by PBR28 distribution volume ratio, is elevated in patients with schizophrenia ( $df=21$   $p<0.001$ ) and subjects at ultra high risk of psychosis ( $df=21$   $p=0.004$ ) in the total gray matter, frontal and temporal lobes (Bloomfield et al., 2016). The mean regional distribution volume ratios are shown for each group together with those for matched controls. The results of the MANCOVA covarying for age and translocator-protein genotype are shown for each case-matched control comparison (Bloomfield et al., 2016).

### Supplementary Table 2:

| Subject #  | Chlorpromazine equivalent - mg/day |
|------------|------------------------------------|
| Patient 1  | 700                                |
| Patient 2  | 1800                               |
| Patient 3  | 100                                |
| Patient 4  | 1000                               |
| Patient 5  | 400                                |
| Patient 6  | 200                                |
| Patient 7  | 900                                |
| Patient 8  | Unmedicated                        |
| Patient 9  | #                                  |
| Patient 10 | 125                                |
| Patient 11 | 100                                |
| Patient 12 | 966                                |
| Patient 13 | #                                  |

|            |    |
|------------|----|
| Patient 14 | 90 |
|------------|----|

**Table: 2 Chlorpromazine equivalent current antipsychotic doses calculated for patients with schizophrenia (Andreasen et al., 2010). # Missing data for two patients.**

Andreasen, N.C., Pressler, M., Nopoulos, P., Miller, D., Ho, B.C., 2010. Antipsychotic dose equivalents and dose-years: a standardized method for comparing exposure to different drugs. *Biol Psychiatry* 67(3), 255-262.

Bloomfield, P.S., Selvaraj, S., Veronese, M., Rizzo, G., Bertoldo, A., Owen, D.R., Bloomfield, M.A., Bonoldi, I., Kalk, N., Turkheimer, F., McGuire, P., de Paola, V., Howes, O.D., 2016. Microglial Activity in People at Ultra High Risk of Psychosis and in Schizophrenia: An [(11)C]PBR28 PET Brain Imaging Study. *Am J Psychiatry* 173(1), 44-52.
